# Supplementary material for: Why do children and adolescents (not) seek and access professional help for their mental health problems? A systematic review of quantitative and qualitative studies
Source: Springer Nature journal article supplement (doi:10.1007/s00787-019-01469-4), 2020-01-21
Supplement: MOESM4 [file 17580820]

**Why do children and adolescents (not) seek and access professional help for their mental health problems? *A systematic review of quantitative and qualitative studies***

*European Child and Adolescent Psychiatry*

Jerica Radez<sup>1</sup>, Tessa Reardon<sup>1,2</sup>, Cathy Creswell<sup>2</sup>, Peter J Lawrence<sup>3</sup>, Georgina Evdoka-Burton<sup>4</sup>, Polly Waite<sup>1,2</sup>

<sup>1</sup> School of Psychology and Clinical Language Sciences, University of Reading, Reading, UK

<sup>2</sup> Departments of Experimental Psychology and Psychiatry, University of Oxford, Oxford, UK

<sup>3</sup> School of Psychology, University of Southampton, Southampton, UK

<sup>4</sup> Slough Community Mental Health Team, Berkshire Healthcare NHS Foundation Trust, Slough, UK

\*Correspondence to Dr Tessa Reardon (tessa.reardon@psych.ox.ac.uk)

Electronic Supplementary Material 4: Quality Rating Checklists

**Table 1** Quality rating checklist for quantitative studies

|                                                           | Yes = 2 | Partial = 1 | No = 0 |
|-----------------------------------------------------------|---------|-------------|--------|
| Question / objective sufficiently described               |         |             |        |
| Study design evident and appropriate                      |         |             |        |
| Method of participant selection described and appropriate |         |             |        |
| Sample size appropriate                                   |         |             |        |
| Participant characteristics sufficiently described        |         |             |        |
| Measure of barriers/facilitators well defined             |         |             |        |
| Measure robust                                            |         |             |        |
| Analyses described/justified and appropriate              |         |             |        |
| Results reported in sufficient detail                     |         |             |        |
| Conclusions supported by the results                      |         |             |        |

*Modified version of Kmet et al's (2004) Standard Quality Assessment Criteria*

**Table 2** Quality rating checklist for qualitative studies

|                                                                                             | Yes = 2 | Partial = 1 | No = 0 |
|---------------------------------------------------------------------------------------------|---------|-------------|--------|
| Question/objective sufficiently described                                                   |         |             |        |
| Are the research question/s suited to qualitative inquiry                                   |         |             |        |
| Study design well described and appropriate                                                 |         |             |        |
| Context of study clear                                                                      |         |             |        |
| Sampling strategy described, appropriate and justified                                      |         |             |        |
| Data collection methods systematic, clearly described and appropriate for research question |         |             |        |
| Data analysis systematic, clearly described and appropriate for research question           |         |             |        |
| Use of verification procedures to establish credibility                                     |         |             |        |
| Are the claims/conclusion credible?                                                         |         |             |        |

*Modified version of Kmet et al's (2004) Standard Quality Assessment Criteria, incorporating Dixon-Woods et al's (2004) prompts*
