# Supplementary material for: Why do children and adolescents (not) seek and access professional help for their mental health problems? A systematic review of quantitative and qualitative studies
Source: Springer Nature journal article supplement (doi:10.1007/s00787-019-01469-4), 2020-01-21
Supplement: MOESM5 [file 17580820]

**Why do children and adolescents (not) seek and access professional help for their mental health problems? *A systematic review of quantitative and qualitative studies***

*European Child and Adolescent Psychiatry*

Jerica Radez<sup>1</sup>, Tessa Reardon<sup>1,2</sup>, Cathy Creswell<sup>2</sup>, Peter J Lawrence<sup>3</sup>, Georgina Evdoka-Burton<sup>4</sup>, Polly Waite<sup>1,2</sup>

<sup>1</sup> School of Psychology and Clinical Language Sciences, University of Reading, Reading, UK

<sup>2</sup> Departments of Experimental Psychology and Psychiatry, University of Oxford, Oxford, UK

<sup>3</sup> School of Psychology, University of Southampton, Southampton, UK

<sup>4</sup> Slough Community Mental Health Team, Berkshire Healthcare NHS Foundation Trust, Slough, UK

\*Correspondence to Dr Tessa Reardon ([tessa.reardon@psych.ox.ac.uk](mailto:tessa.reardon@psych.ox.ac.uk))

Electronic Supplementary Material 5: List of barrier and facilitator themes and subthemes identified in each study

**Table 1** Barriers and facilitators identified in quantitative studies

| Study                                                     | Barrier/Facilitator themes and subthemes identified                                                                                                                                                                                                                                              |                                                                                                                                                       |                                                                                                                |                                                                                           |
|-----------------------------------------------------------|--------------------------------------------------------------------------------------------------------------------------------------------------------------------------------------------------------------------------------------------------------------------------------------------------|-------------------------------------------------------------------------------------------------------------------------------------------------------|----------------------------------------------------------------------------------------------------------------|-------------------------------------------------------------------------------------------|
|                                                           | Young people's individual factors                                                                                                                                                                                                                                                                | Social factors                                                                                                                                        | Relationship factors                                                                                           | Systemic and structural factors                                                           |
| Boyd et al. (2011)                                        | Past experiences, Preference for informal support, Preference for self-reliance                                                                                                                                                                                                                  | Views and attitudes towards MH and help-seeking in the wider environment                                                                              | Ability to trust unknown person                                                                                | Accessibility of professional help, Availability of professional help, Logistical factors |
| Chandra & Minkovitz (2006)                                | Knowledge about MH and MH services, Perceived effectiveness of professional help, Ability to verbalise the need for help and to talk about MH difficulties                                                                                                                                       | Views and attitudes towards MH and help-seeking in the wider environment, Views and attitudes towards MH and help-seeking within YP's support network | Ability to trust unknown person                                                                                |                                                                                           |
| Cigularov, Chen, Thurber, & Stallones (2008)              | Broader perceptions of help-seeking, Perceived effectiveness of professional help, Emotional and motivational factors, Factors associated with commitment to the process of help-seeking                                                                                                         | Views and attitudes towards MH and help-seeking in the wider environment, Anticipated consequences of help-seeking on social network                  | Ability to trust unknown person, Perceived confidentiality                                                     | Accessibility of professional help                                                        |
| D'Amico et al. (2004)                                     |                                                                                                                                                                                                                                                                                                  | Views and attitudes towards MH and help-seeking within YP's support network                                                                           | Perceived confidentiality, Perception of contact with professionals, Similarity between YP and MH professional | Logistical factors                                                                        |
| Freedenthal & Stiffman (2007)                             | Knowledge about MH and MH services, Broader perceptions of help-seeking, Emotional and motivational factors, Preference for informal support, Preference for self-reliance                                                                                                                       | Views and attitudes towards MH and help-seeking in the wider environment                                                                              |                                                                                                                |                                                                                           |
| Gould et al. (2006)                                       | Knowledge about MH and MH services, Perceived effectiveness of professional help, Factors associated with commitment to the process of help-seeking, Ability to verbalise the need for help and to talk about MH difficulties, Preference for informal support, Preference for self-reliance     | Views and attitudes towards MH and help-seeking in the wider environment                                                                              |                                                                                                                |                                                                                           |
| Gould et al. (2009)                                       | Knowledge about MH and MH services, Factors associated with commitment to the process of help-seeking, Past experiences                                                                                                                                                                          |                                                                                                                                                       | Ability to trust unknown person                                                                                | Costs of professional help, Logistical factors                                            |
| Guo, Kataoka, Bear, & Lau (2014)                          | Knowledge about MH and MH services, Ability to verbalise the need for help and to talk about MH difficulties                                                                                                                                                                                     | Views and attitudes towards MH and help-seeking in the wider environment                                                                              | Perceived confidentiality, Similarity between YP and MH professional                                           | Costs of professional help, Logistical factors                                            |
| Guterman, Haj-Yahia, Vorhies, Ismayilova, & Leshem (2010) | Knowledge about MH and MH services, Preference for self-reliance, Broader perceptions of help-seeking, Perceived effectiveness of professional help, Factors associated with commitment to the process of help-seeking, Ability to verbalise the need for help and to talk about MH difficulties | Views and attitudes towards MH and help-seeking in the wider environment, Views and attitudes towards MH and help-seeking within YP's support network | Perceived confidentiality, Perception of contact with professionals                                            |                                                                                           |

|                                                 |                                                                                                                                                                                                                                                                                                                                   |                                                                                                                                                                                                                   |                                           |                                                                                                                       |
|-------------------------------------------------|-----------------------------------------------------------------------------------------------------------------------------------------------------------------------------------------------------------------------------------------------------------------------------------------------------------------------------------|-------------------------------------------------------------------------------------------------------------------------------------------------------------------------------------------------------------------|-------------------------------------------|-----------------------------------------------------------------------------------------------------------------------|
| Haavik, Joa, Hatloy, Stain, & Langeveld, (2017) | Knowledge about MH and MH services, Broader perceptions of help-seeking, Factors associated with commitment to the process of help-seeking                                                                                                                                                                                        |                                                                                                                                                                                                                   | Perception of contact with professionals  | Availability of professional help, Costs of professional help                                                         |
| Khairani, Zaiton, & Faridah (2005)              | Knowledge about MH and MH services, Emotional and motivational factors, Ability to verbalise the need for help and to talk about MH difficulties                                                                                                                                                                                  |                                                                                                                                                                                                                   | Perceived confidentiality                 |                                                                                                                       |
| Kuhl, Jarkon-Horlick, & Morrissey (1997)        | Knowledge about MH and MH services, Broader perceptions of help-seeking, Perceived effectiveness of professional help, Emotional and motivational factors, Factors associated with commitment to the process of help-seeking, Past experiences, Perceived autonomy, Preference for informal support, Preference for self-reliance | Views and attitudes towards MH and help-seeking in the wider environment, Views and attitudes towards MH and help-seeking within YP's support network, Anticipated consequences of help-seeking on social network | Similarity between YP and MH professional | Costs of professional help, Logistical factors                                                                        |
| Lubman et al. (2017)                            | Preference for self-reliance, Perceived autonomy, Emotional and motivational factors                                                                                                                                                                                                                                              | Views and attitudes towards MH and help-seeking in the wider environment                                                                                                                                          |                                           | Costs of professional help                                                                                            |
| Meredith et al. (2009)                          | Preference for self-reliance                                                                                                                                                                                                                                                                                                      | Views and attitudes towards MH and help-seeking in the wider environment, Views and attitudes towards MH and help-seeking within YP's support network                                                             |                                           | Accessibility of professional help, Availability of professional help, Costs of professional help, Logistical factors |
| Muthupalaniappen et al. (2012)                  | Knowledge about MH and MH services, Perceived effectiveness of professional help, Factors associated with commitment to the process of help-seeking, Preference for informal support, Preference for self-reliance                                                                                                                | Views and attitudes towards MH and help-seeking in the wider environment                                                                                                                                          | Ability to trust unknown person           | Costs of professional help, Logistical factors                                                                        |
| Samargia, Saewyc, & Elliott (2006)              | Knowledge about MH and MH services, Factors associated with commitment to the process of help-seeking, Perceived autonomy, Emotional and motivational factors                                                                                                                                                                     | Views and attitudes towards MH and help-seeking in the wider environment                                                                                                                                          |                                           | Costs of professional help, Logistical factors                                                                        |
| Sharma, Banerjee, & Garg (2017)                 | Knowledge about MH and MH services, Perceived effectiveness of professional help                                                                                                                                                                                                                                                  | Views and attitudes towards MH and help-seeking in the wider environment                                                                                                                                          |                                           |                                                                                                                       |
| Sheffield, Fiorenza, & Sofronoff (2004)         | Knowledge about MH and MH services, Perceived effectiveness of professional                                                                                                                                                                                                                                                       | Views and attitudes towards MH and help-seeking in the wider environment                                                                                                                                          | Perceived confidentiality                 | Costs of professional help, Logistical factors                                                                        |

---

|                                               |                                                                                                                                                                                                                                                    |                                                                                                                                                                                                                   |                                                                      |                                                |
|-----------------------------------------------|----------------------------------------------------------------------------------------------------------------------------------------------------------------------------------------------------------------------------------------------------|-------------------------------------------------------------------------------------------------------------------------------------------------------------------------------------------------------------------|----------------------------------------------------------------------|------------------------------------------------|
|                                               | help, Perceived autonomy, Preference for self-reliance                                                                                                                                                                                             |                                                                                                                                                                                                                   |                                                                      |                                                |
| Sylwestrzak, Overholt, Ristau, & Coker (2015) | Knowledge about MH and MH services, Broader perceptions of help-seeking, Perceived effectiveness of professional help, Factors associated with commitment to the process of help-seeking, Past experiences, Preference for self-reliance           | Views and attitudes towards MH and help-seeking in the wider environment                                                                                                                                          |                                                                      | Costs of professional help, Logistical factors |
| Wilson & Deane (2012)                         | Broader perceptions of help-seeking, Emotional and motivational factors, Past experiences, Perceived autonomy, Preference for self-reliance                                                                                                        | Views and attitudes towards MH and help-seeking in the wider environment                                                                                                                                          | Perceived confidentiality, Similarity between YP and MH professional |                                                |
| Wilson et al. (2007)                          | Preference for self-reliance                                                                                                                                                                                                                       | Views and attitudes towards MH and help-seeking in the wider environment                                                                                                                                          | Ability to trust unknown person                                      |                                                |
| Wilson et al. (2008)                          | Knowledge about MH and MH services, Factors associated with commitment to the process of help-seeking, Perceived autonomy                                                                                                                          | Views and attitudes towards MH and help-seeking in the wider environment                                                                                                                                          | Perception of contact with professionals                             |                                                |
| Wu et al. (2016)                              | Broader perceptions of help-seeking, Perceived effectiveness of professional help, Factors associated with commitment to the process of help-seeking, Ability to verbalise the need for help and to talk about MH difficulties, Perceived autonomy | Views and attitudes towards MH and help-seeking in the wider environment, Views and attitudes towards MH and help-seeking within YP's support network, Anticipated consequences of help-seeking on social network |                                                                      | Logistical factors                             |

---

**Table 2** Barriers and facilitators identified in qualitative studies

| Study                                                         | Barrier/Facilitator themes and subthemes identified                                                                                                                                                        |                                                                                                                                       |                                                                     |                                                                                                      |
|---------------------------------------------------------------|------------------------------------------------------------------------------------------------------------------------------------------------------------------------------------------------------------|---------------------------------------------------------------------------------------------------------------------------------------|---------------------------------------------------------------------|------------------------------------------------------------------------------------------------------|
|                                                               | Young people's individual factors                                                                                                                                                                          | Social factors                                                                                                                        | Relationship factors                                                | Systemic and structural factors                                                                      |
| Balle Tharaldsen, Stallard, Cuijpers, Bru, & Bjaastad (2017)  | Broader perceptions of help-seeking, Ability to verbalise the need for help and to talk about MH difficulties                                                                                              | Views and attitudes towards MH and help-seeking in the wider environment, Anticipated consequences of help-seeking on social network  |                                                                     | Logistical factors                                                                                   |
| Becker, Swenson, Esposito-Smythers, Cataldo, & Spirito (2014) | Knowledge about MH and MH services, Perceived effectiveness of professional help, Preference for self-reliance                                                                                             | Views and attitudes towards MH and help-seeking in the wider environment                                                              | Perceived confidentiality                                           | Costs of professional help, Logistical factors                                                       |
| Breland-Noble, Wong, Childers, Hankerson, & Sotomayor (2015)  |                                                                                                                                                                                                            | Views and attitudes towards MH and help-seeking in the wider environment                                                              |                                                                     |                                                                                                      |
| Bullock, Nadeau, & Renaud (2012)                              | Preference for informal support                                                                                                                                                                            | Views and attitudes towards MH and help-seeking within YP's support network                                                           |                                                                     |                                                                                                      |
| Bussing et al. (2012)                                         | Broader perceptions of help-seeking, Perceived effectiveness of professional help                                                                                                                          | Views and attitudes towards MH and help-seeking in the wider environment, Anticipated consequences of help-seeking on social network  |                                                                     | Costs of professional help                                                                           |
| Chandra & Minkovitz (2007)                                    | Broader perceptions of help-seeking, Past experiences                                                                                                                                                      | Views and attitudes towards MH and help-seeking within YP support network, Anticipated consequences of help-seeking on social network |                                                                     |                                                                                                      |
| Clark, Hudson, Dunstan, & Clark (2018)                        | Knowledge about MH and MH services, Broader perceptions of help-seeking, Emotional and motivational factors, Preference for self-reliance                                                                  | Views and attitudes towards MH and help-seeking in the wider environment                                                              |                                                                     | Accessibility of professional help, Availability of professional help, Use of information technology |
| De Anstiss & Ziaian (2010)                                    | Knowledge about MH and MH services, Broader perceptions of help-seeking, Factors associated with commitment to the process of help-seeking, Preference for informal support                                | Views and attitudes towards MH and help-seeking in the wider environment, Anticipated consequences of help-seeking on social network  | Similarity between YP and MH professional                           |                                                                                                      |
| Del Mauro & Jackson Williams (2013)                           | Factors associated with commitment to the process of help-seeking, Ability to verbalise the need for help and to talk about MH difficulties, Preference for informal support, Preference for self-reliance | Views and attitudes towards MH and help-seeking in the wider environment                                                              | Perceived confidentiality, Perception of contact with professionals |                                                                                                      |
| Doyle, Treacy, & Sheridan (2017)                              | Knowledge about MH and MH services, Perceived autonomy                                                                                                                                                     | Views and attitudes towards MH and help-seeking in the wider environment                                                              | Ability to trust unknown person, Perceived confidentiality          | Availability of professional help                                                                    |

|                                                      |                                                                                                                                                                                                                                                      |                                                                                                                                                                                                                   |                                                                                                                |                                                       |
|------------------------------------------------------|------------------------------------------------------------------------------------------------------------------------------------------------------------------------------------------------------------------------------------------------------|-------------------------------------------------------------------------------------------------------------------------------------------------------------------------------------------------------------------|----------------------------------------------------------------------------------------------------------------|-------------------------------------------------------|
| Fleming, Dixon, & Merry (2012)                       | Emotional and motivational factors                                                                                                                                                                                                                   | Views and attitudes towards MH and help-seeking in the wider environment                                                                                                                                          | Ability to trust unknown person                                                                                | Use of information technology                         |
| Fornos et al. (2005)                                 | Knowledge about MH and MH services, Broader perceptions of help-seeking                                                                                                                                                                              | Views and attitudes towards MH and help-seeking in the wider environment, Views and attitudes towards MH and help-seeking within YP's support network, Anticipated consequences of help-seeking on social network | Perceived confidentiality                                                                                      | Costs of professional help                            |
| Fortune et al. (2008a); Fortune et al. (2008b)       | Knowledge about MH and MH services, Broader perceptions of help-seeking, Emotional and motivational factors, Ability to verbalise the need for help and to talk about MH difficulties, Preference for informal support, Preference for self-reliance | Views and attitudes towards MH and help-seeking in the wider environment, Views and attitudes towards MH and help-seeking within YP's support network, Anticipated consequences of help-seeking on social network | Perceived confidentiality, Perception of contact with professionals                                            | Accessibility of professional help                    |
| Francis, Boyd, Aisbett, Newnham, & Newnham (2006)    | Broader perceptions of help-seeking                                                                                                                                                                                                                  | Views and attitudes towards MH and help-seeking in the wider environment                                                                                                                                          |                                                                                                                | Availability of professional help, Logistical factors |
| Gonçalves, Moleiro, Goncalves, & Moleiro (2012)      | Perceived autonomy, Preference for informal support, Preference for self-reliance                                                                                                                                                                    | Views and attitudes towards MH and help-seeking in the wider environment, Views and attitudes towards MH and help-seeking within YP's support network                                                             | Similarity between YP and MH professional                                                                      | Costs of professional help                            |
| Gronholm, Thornicroft, Laurens, & Evans-Lacko (2017) | Factors associated with commitment to the process of help-seeking                                                                                                                                                                                    | Views and attitudes towards MH and help-seeking in the wider environment                                                                                                                                          | Perceived confidentiality                                                                                      |                                                       |
| Hassett & Isbister (2017)                            | Knowledge about MH and MH services, Broader perceptions of help-seeking, Factors associated with commitment to the process of help-seeking, Ability to verbalise the need for help and to talk about MH difficulties, Perceived autonomy             | Views and attitudes towards MH and help-seeking in the wider environment, Views and attitudes towards MH and help-seeking within YP's support network                                                             | Perception of contact with professionals, Similarity between YP and MH professional                            | Use of information technology, Logistical factors     |
| Huggins et al. (2016)                                | Knowledge about MH and MH services                                                                                                                                                                                                                   | Views and attitudes towards MH and help-seeking in the wider environment                                                                                                                                          | Perceived confidentiality                                                                                      | Accessibility of professional help                    |
| Kendal, Keeley, & Callery (2014)                     | Knowledge about MH and MH services, Factors associated with commitment to the process of help-seeking, Perceived autonomy                                                                                                                            | Anticipated consequences of help-seeking on social network                                                                                                                                                        | Perceived confidentiality, Ability to trust unknown person                                                     | Accessibility of professional help                    |
| Klineberg, Kelly, Stansfeld, & Bhui (2013)           | Factors associated with commitment to the process of help-seeking                                                                                                                                                                                    | Views and attitudes towards MH and help-seeking in the wider environment, Anticipated consequences of help-seeking on social network                                                                              | Perceived confidentiality, Perception of contact with professionals, Similarity between YP and MH professional |                                                       |

|                                                        |                                                                                                                                                                                            |                                                                                                                                                                                                                   |                                                                                                      |                                                                                                      |
|--------------------------------------------------------|--------------------------------------------------------------------------------------------------------------------------------------------------------------------------------------------|-------------------------------------------------------------------------------------------------------------------------------------------------------------------------------------------------------------------|------------------------------------------------------------------------------------------------------|------------------------------------------------------------------------------------------------------|
| Leavey, Rothi, & Paul (2011)                           | Perceived effectiveness of professional help, Perceived autonomy                                                                                                                           |                                                                                                                                                                                                                   | Perception of contact with professionals                                                             | Accessibility of professional help, Availability of professional help, Use of information technology |
| Lindsey, Chambers, Pohle, Beall, & Lucksted (2013)     | Broader perceptions of help-seeking, Ability to verbalise the need for help and to talk about MH difficulties, Preference for informal support, Preference for self-reliance               | Views and attitudes towards MH and help-seeking in the wider environment, Views and attitudes towards MH and help-seeking within YP's support network, Anticipated consequences of help-seeking on social network | Ability to trust unknown person, Similarity between YP and MH professional                           | Availability of professional help                                                                    |
| Lindsey et al. (2006); Lindsey, Joe, & Nebbitt (2010)  | Broader perceptions of help-seeking, Preference for informal support, Preference for self-reliance                                                                                         | Views and attitudes towards MH and help-seeking in the wider environment, Views and attitudes towards MH and help-seeking within YP's support network                                                             | Ability to trust unknown person, Similarity between YP and MH professional                           |                                                                                                      |
| McAndrew & Warne (2014)                                | Knowledge about MH and MH services, Emotional and motivational factors                                                                                                                     | Views and attitudes towards MH and help-seeking in the wider environment                                                                                                                                          | Perceived confidentiality, Perception of contact with professionals                                  | Accessibility of professional help                                                                   |
| Meredith et al. (2009)                                 | Factors associated with commitment to the process of help-seeking                                                                                                                          | Views and attitudes towards MH and help-seeking in the wider environment                                                                                                                                          |                                                                                                      | Logistical factors                                                                                   |
| Mueller & Abrutyn (2016)                               |                                                                                                                                                                                            | Views and attitudes towards MH and help-seeking in the wider environment                                                                                                                                          |                                                                                                      |                                                                                                      |
| Pailler et al. (2009)                                  | Factors associated with commitment to the process of help-seeking                                                                                                                          | Views and attitudes towards MH and help-seeking within YP's support network                                                                                                                                       |                                                                                                      | Costs of professional help, Logistical factors                                                       |
| Prior (2012)                                           | Perceived effectiveness of professional help, Perceived autonomy                                                                                                                           | Views and attitudes towards MH and help-seeking in the wider environment, Views and attitudes towards MH and help-seeking within YP's support network                                                             | Ability to trust unknown person                                                                      |                                                                                                      |
| Timlin-Scalera, Ponterotto, Blumberg, & Jackson (2003) | Knowledge about MH and MH services, Broader perceptions of help-seeking, Factors associated with commitment to the process of help-seeking, Preference for self-reliance, Past experiences | Views and attitudes towards MH and help-seeking in the wider environment, Views and attitudes towards MH and help-seeking within YP's support network                                                             | Perceived confidentiality                                                                            | Availability of professional help                                                                    |
| Wilson & Deane (2001)                                  | Knowledge about MH and MH services, Factors associated with commitment to the process of help-seeking, Past experiences                                                                    | Views and attitudes towards MH and help-seeking in the wider environment                                                                                                                                          | Perceived confidentiality, Ability to trust unknown person, Perception of contact with professionals |                                                                                                      |
| Wisdom, Clarke, & Green (2006)                         | Broader perceptions of help-seeking, Perceived autonomy                                                                                                                                    | Views and attitudes towards MH and help-seeking in the wider environment                                                                                                                                          |                                                                                                      |                                                                                                      |
